# Supplementary material for: Characterization and drug release behavior of highly responsive chip-like electrically modulated reduced graphene oxide–poly(vinyl alcohol) membranes
Source: Royal Society of Chemistry journal article supplement (doi:10.1039/c2jm32772d), 2012-01-01
Supplement: c2jm32772d.pdf [file c2jm32772d.pdf]

# Supplementary Information

## Characterization and Drug Release Behavior of Highly Responsive and Chip-like

### Electrically Modulated Reduced Graphene Oxide/ Poly(vinyl alcohol)

#### Membranes

Heng-Wen Liu, Shang-Hsiu Hu, Yu-Wei Chen, and San-Yuan Chen\*

Department of Materials Sciences and Engineering,  
National Chiao Tung University, Hsinchu, Taiwan  
No. 1001 Ta Hsueh Rd., Hsinchu Taiwan 300, R.O.C.

TEL: +8863-5731818

FAX: +8863-5724727

E-mail: [sanyuanchen@mail.nctu.edu.tw](mailto:sanyuanchen@mail.nctu.edu.tw)

Corresponding author: San-Yuan Chen

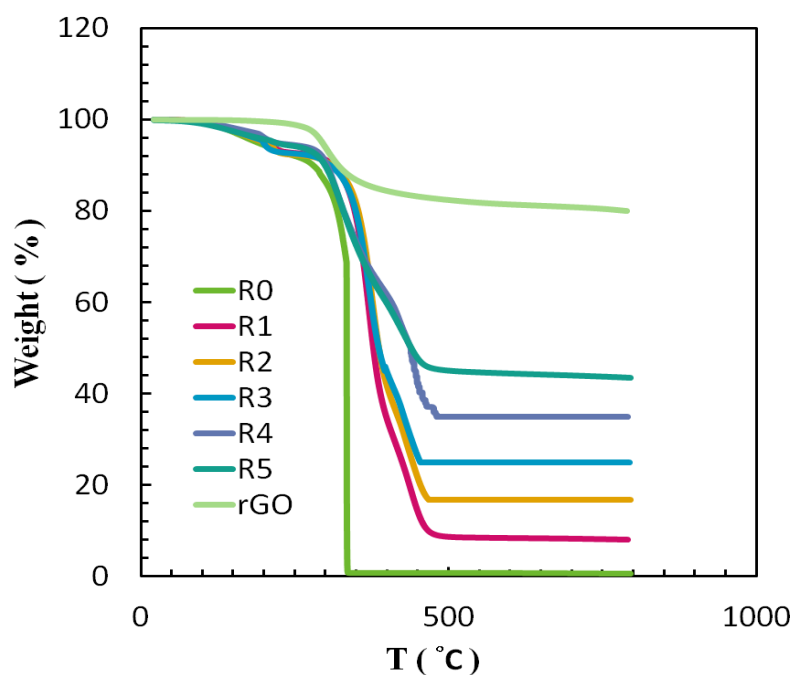

**Fig. S1** Thermogravimetric curves of pure PVA, reduced graphene oxide, and rGO/PVA hydrogels with different rGO loading.

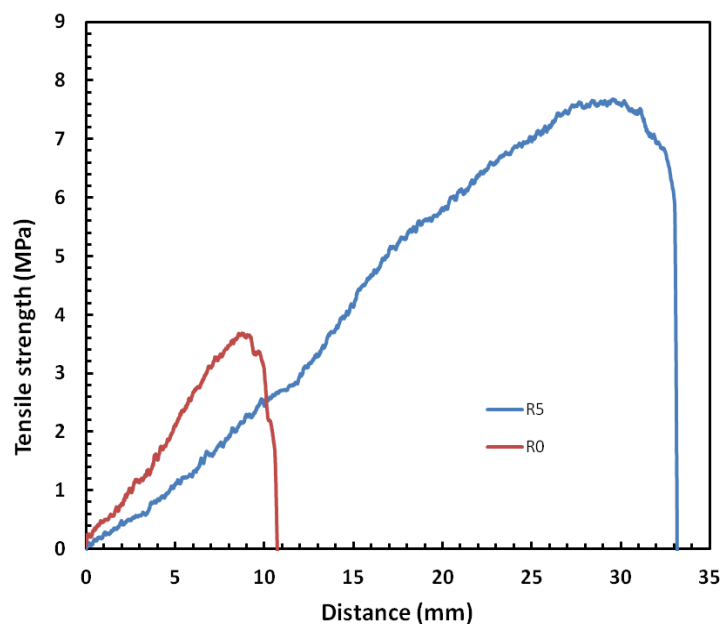

**Fig. S2** The hybrid hydrogels higher rGO content show much enhanced mechanical property.

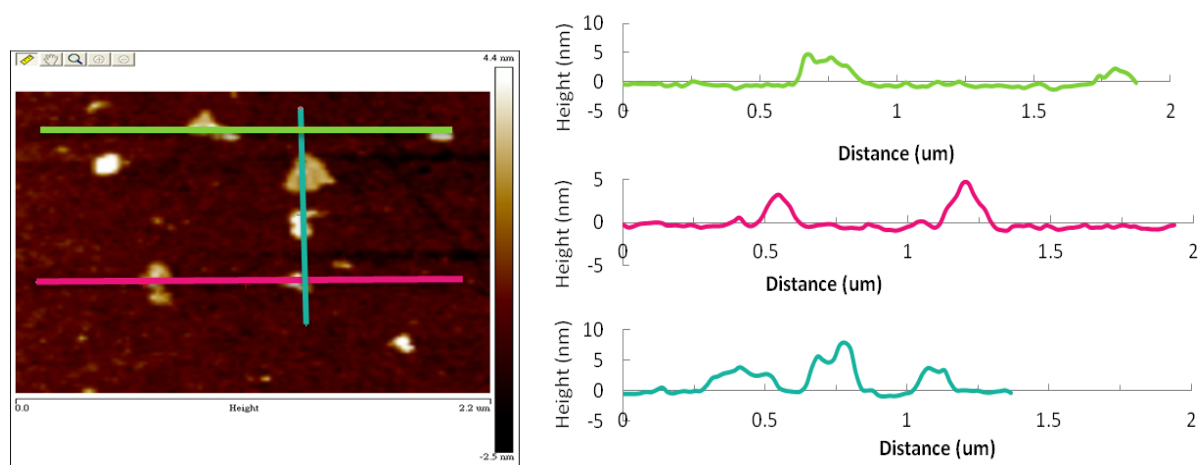

**Fig. S3** AFM image of exfoliated rGO sheets with three height profiles acquired in different locations.

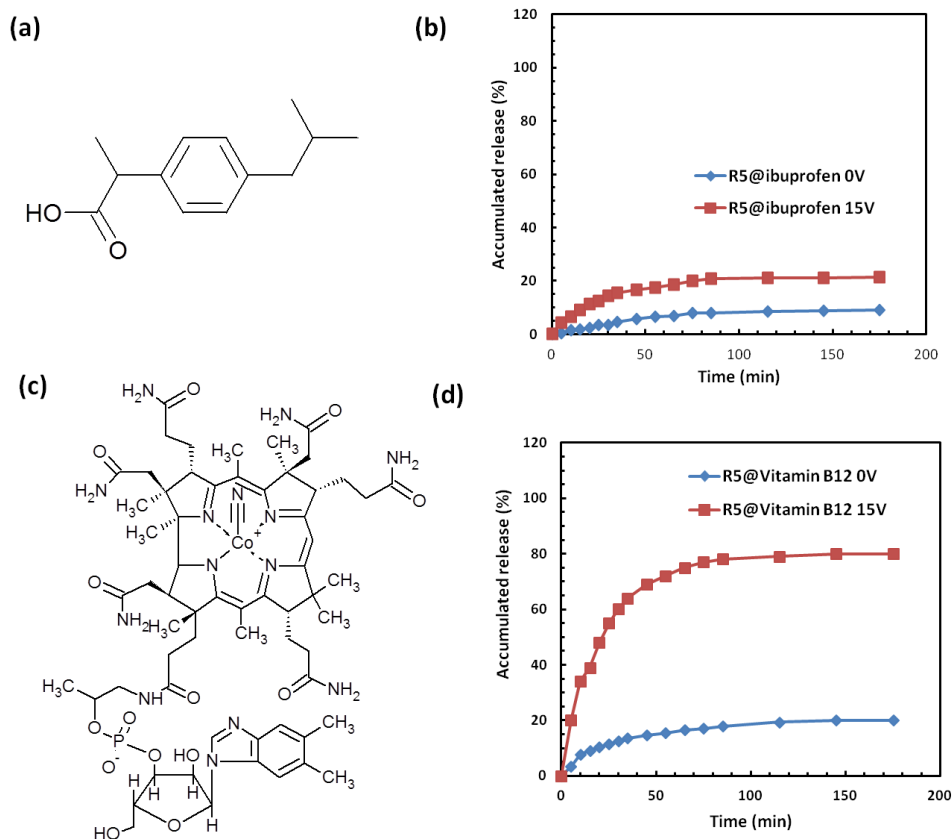

**Fig. S4** (a) The chemical structure of ibuprofen (hydrophobic drug). (b) The drug release behavior of ibuprofen from R5 rGO/PVA hydrogel. (c) The chemical structure of vitamin B<sub>12</sub> (higher molecular weight and hydrophilic drug). (d) The drug release behavior of vitamin B<sub>12</sub> from R5 rGO/PVA hydrogel. All the drug release results reflect the average of three measurements, and the difference between each measurement is < 5%.

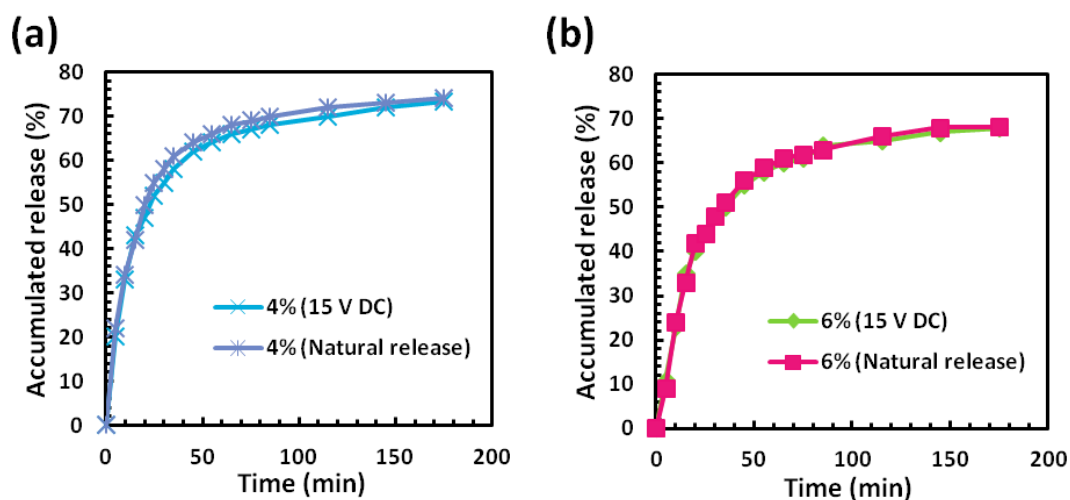

**Fig. S5** The accumulated natural and electrically-stimulated release of rGO/PVA hydrogel with (a) 4 wt% rGO (b) 6 wt% rGO. Both natural and electrical-stimulation release displayed almost the same drug released amount for the rGO/PVA hydrogels with the rGO loading below 8.11wt%. The electrical stimulation did not show an enhancement in the drug released amount for 4wt% and 6wt% rGO-loaded hydrogels. Moreover, the cumulative released drug level of the electrically-stimulated hydrogels is slight reduction as compared to those naturally released. For 4wt% rGO, the accumulated release level for natural release is 74.12%, while for electrical stimulation is 73.33%. For 6wt% rGO, the accumulated release level for natural release is 68.13%, while for electrical stimulation is 67.89%.

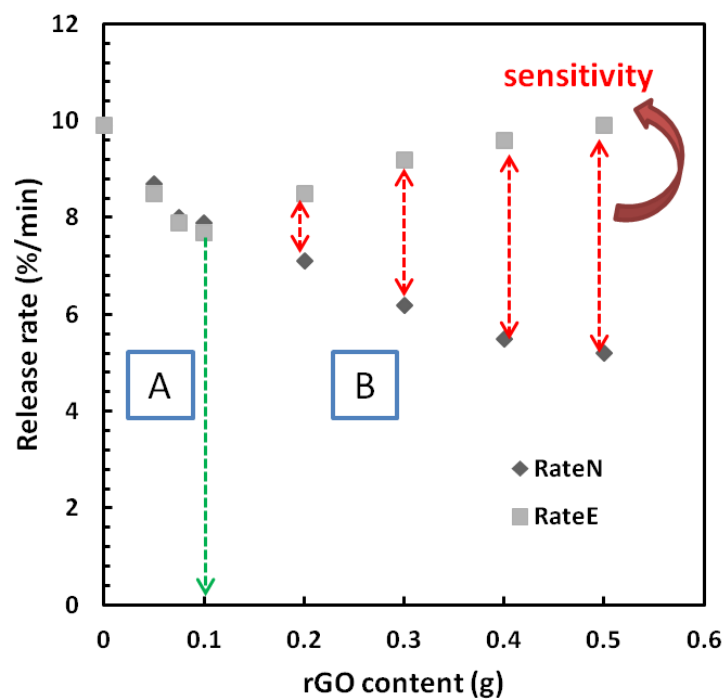

**Fig. S6** Electric sensitivity of rGO/PVA hydrogel for naturally-released rate ( $R_N$ ) and the electrically-stimulated released rate ( $R_E$ ) under applied with a constant applied voltage(15 V) at a short time period in terms of the content of rGO. (Region A: little sensitivity; Region B: region of increasing sensitivity)

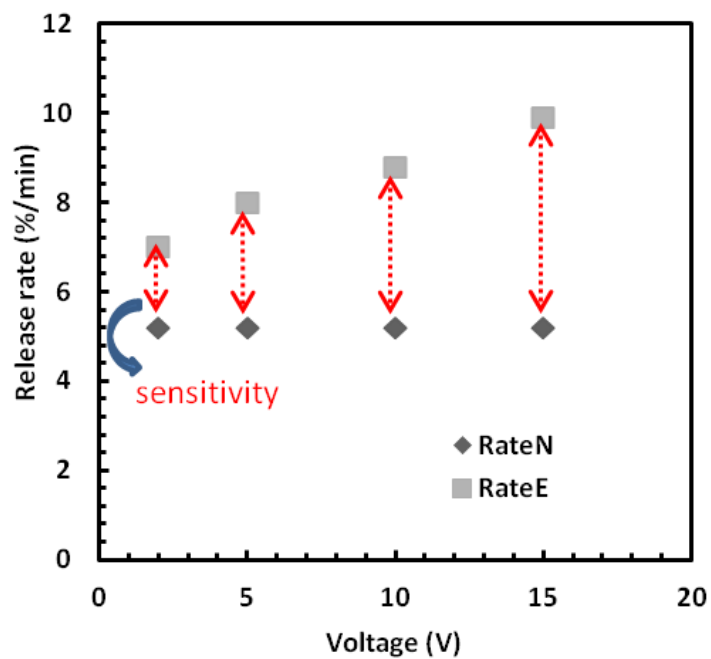

**Fig. S7** Electric sensitivity of R5 rGO/PVA hydrogel for the naturally-released rate ( $R_N$ ) and electrically-stimulated released rate ( $R_E$ ) under different voltage stimulation at a short time period .
